# Supplementary material
Source: publisher site journal article supplement (https://www.dovepress.com/article/523545)
Supplement: Supplementary file 1 [file 523545%20Supplementary%20Tables%201-2_1.docx]

| **Supplemental Table 1.** Multicollinearity Assessment of Different Liver Fibrosis Indices and Covariates for Hemorrhagic Transformation Analysis in Acute Ischemic Stroke | | | | | | | | | | | | | | |
| --- | --- | --- | --- | --- | --- | --- | --- | --- | --- | --- | --- | --- | --- | --- |
| **Variable** | **Tolerancea** | **VIFa** | **Toleranceb** | **VIFb** | **Tolerancec** | **VIFc** | **Toleranced** | **VIFd** | **Tolerancee** | **VIFe** | **Tolerancef** | **VIFf** | **Toleranceg** | **VIFg** |
| **Liver Fibrosis** |  |  |  |  |  |  |  |  |  |  |  |  |  |  |
| FIB-4 index | 0.431 | 2.316 | - | - | - | - | - | - | - | - | - | - | - | - |
| Modified FIB-4 | - | - | 0.689 | 1.452 | - | - | - | - | - | - | - | - | - | - |
| FIB-5 index | - | - | - | - | 0.622 | 1.609 | - | - | - | - | - | - | - | - |
| APRI score | - | - | - | - | - | - | 0.145 | 6.887 | - | - | - | - | - | - |
| Forns index | - | - | - | - | - | - | - | - | 0.420 | 2.378 | - | - | - | - |
| ARR score | - | - | - | - | - | - | - | - | - | - | 0.861 | 1.161 | - | - |
| AARPRI | - | - | - | - | - | - | - | - | - | - | - | - | 0.671 | 1.490 |
| **SBP** | 0.895 | 1.117 | 0.904 | 1.107 | 0.907 | 1.102 | 0.929 | 1.076 | 0.905 | 1.105 | 0.904 | 1.107 | 0.904 | 1.106 |
| **NIHSS score** | 0.531 | 1.883 | 0.537 | 1.862 | 0.544 | 1.837 | 0.531 | 1.883 | 0.549 | 1.823 | 0.545 | 1.833 | 0.538 | 1.859 |
| **GCS score** | 0.559 | 1.787 | 0.567 | 1.764 | 0.573 | 1.746 | 0.560 | 1.784 | 0.573 | 1.744 | 0.573 | 1.745 | 0.568 | 1.761 |
| **ASPECT score** | 0.964 | 1.037 | 0.962 | 1.040 | 0.960 | 1.041 | 0.961 | 1.040 | 0.972 | 1.029 | 0.960 | 1.041 | 0.959 | 1.043 |
| **PRT** | 0.832 | 1.201 | 0.833 | 1.200 | 0.825 | 1.212 | 0.818 | 1.222 | 0.825 | 1.211 | 0.827 | 1.209 | 0.831 | 1.203 |
| **NOTA** | 0.877 | 1.140 | 0.877 | 1.140 | 0.874 | 1.144 | 0.878 | 1.139 | 0.873 | 1.145 | 0.875 | 1.143 | 0.877 | 1.140 |
| **White blood cell** | 0.007 | 134.096 | 0.007 | 133.994 | 0.008 | 131.049 | 0.008 | 124.184 | 0.008 | 126.228 | 0.007 | 134.034 | 0.007 | 133.999 |
| **Neutrophils** | 0.007 | 134.770 | 0.007 | 134.662 | 0.008 | 131.701 | 0.008 | 124.456 | 0.008 | 126.602 | 0.007 | 134.587 | 0.007 | 134.662 |
| **Lymphocytes** | 0.204 | 4.880 | 0.202 | 4.957 | 0.202 | 4.947 | 0.220 | 4.540 | 0.213 | 4.695 | 0.198 | 5.053 | 0.200 | 5.001 |
| **Total bilirubin** | 0.893 | 1.120 | 0.896 | 1.116 | 0.896 | 1.116 | 0.888 | 1.127 | 0.896 | 1.116 | 0.898 | 1.113 | 0.897 | 1.115 |
| **AST** | 0.625 | 1.601 | 0.926 | 1.080 | 0.892 | 1.121 | 0.189 | 5.300 | 0.927 | 1.079 | 0.882 | 1.133 | 0.906 | 1.104 |
| **Triglycerides** | 0.862 | 1.160 | 0.859 | 1.164 | 0.857 | 1.166 | 0.867 | 1.153 | 0.841 | 1.189 | 0.857 | 1.167 | 0.858 | 1.165 |
| **Platelet count** | 0.549 | 1.821 | 0.647 | 1.546 | 0.595 | 1.682 | 0.392 | 2.552 | 0.429 | 2.332 | 0.819 | 1.222 | 0.638 | 1.566 |
| Superscripts a-g represent multicollinearity diagnostics for different liver fibrosis indices (FIB-4, Modified FIB-4, FIB-5, APRI, Forns, ARR, and AARPRI, respectively) along with relevant covariates to be included in subsequent hemorrhagic transformation analysis. Due to high collinearity between white blood cell count (WBC) and neutrophil count, and considering that WBC comprises both neutrophils and lymphocytes, WBC was excluded while neutrophils and lymphocytes were retained for the multivariable analysis. VIF<10 and Tolerance>0.1 indicate acceptable levels of multicollinearity. | | | | | | | | | | | | | | |

| **Supplemental Table 2.** Multicollinearity Assessment of Different Liver Fibrosis Indices and Covariates for Symptomatic Intracerebral Hemorrhage Analysis in Acute Ischemic Stroke | | | | | | | | | | | | | | |
| --- | --- | --- | --- | --- | --- | --- | --- | --- | --- | --- | --- | --- | --- | --- |
| **Variable** | **Tolerancea** | **VIFa** | **Toleranceb** | **VIFb** | **Tolerancec** | **VIFc** | **Toleranced** | **VIFd** | **Tolerancee** | **VIFe** | **Tolerancef** | **VIFf** | **Toleranceg** | **VIFg** |
| **Liver Fibrosis** |  |  |  |  |  |  |  |  |  |  |  |  |  |  |
| FIB-4 index | 0.320 | 3.122 | - | - | - | - | - | - | - | - | - | - | - | - |
| Modified FIB-4 | - | - | 0.506 | 1.976 | - | - | - | - | - | - | - | - | - | - |
| FIB-5 index | - | - | - | - | 0.381 | 2.627 | - | - | - | - | - | - | - | - |
| APRI score | - | - | - | - | - | - | 0.126 | 7.950 | - | - | - | - | - | - |
| Forns index | - | - | - | - | - | - | - | - | 0.425 | 2.351 | - | - | - | - |
| ARR score | - | - | - | - | - | - | - | - | - | - | 0.515 | 1.942 | - | - |
| AARPRI | - | - | - | - | - | - | - | - | - | - | - | - | 0.448 | 2.233 |
| **NIHSS score** | 0.549 | 1.820 | 0.567 | 1.763 | 0.567 | 1.768 | 0.543 | 1.841 | 0.558 | 1.792 | 0.570 | 1.755 | 0.579 | 1.728 |
| **GCS score** | 0.562 | 1.780 | 0.573 | 1.746 | 0.573 | 1.770 | 0.554 | 1.807 | 0.554 | 1.805 | 0.567 | 1.764 | 0.581 | 1.722 |
| **ASPECT score** | 0.901 | 1.109 | 0.899 | 1.112 | 0.899 | 1.096 | 0.911 | 1.097 | 0.920 | 1.087 | 0.913 | 1.096 | 0.902 | 1.109 |
| **Anticoagulation therapy** | 0.835 | 1.198 | 0.834 | 1.199 | 0.834 | 1.176 | 0.838 | 1.193 | 0.851 | 1.175 | 0.850 | 1.177 | 0.833 | 1.200 |
| **NOTA** | 0.946 | 1.057 | 0.950 | 1.053 | 0.950 | 1.050 | 0.945 | 1.058 | 0.959 | 1.043 | 0.953 | 1.049 | 0.947 | 1.056 |
| **White blood cell** | 0.004 | 246.137 | 0.004 | 251.165 | 0.004 | 269.344 | 0.004 | 268.522 | 0.004 | 273.023 | 0.004 | 262.593 | 0.004 | 256.770 |
| **Neutrophils** | 0.004 | 242.366 | 0.004 | 247.700 | 0.004 | 266.397 | 0.004 | 265.003 | 0.004 | 270.224 | 0.004 | 259.388 | 0.004 | 253.797 |
| **Lymphocytes** | 0.193 | 5.176 | 0.185 | 5.400 | 0.185 | 5.916 | 0.171 | 5.851 | 0.165 | 6.077 | 0.173 | 5.773 | 0.181 | 5.512 |
| **Total protein** | 0.831 | 1.203 | 0.826 | 1.211 | 0.826 | 1.307 | 0.819 | 1.220 | 0.808 | 1.237 | 0.812 | 1.231 | 0.817 | 1.224 |
| **ALT** | 0.566 | 1.766 | 0.559 | 1.790 | 0.559 | 2.235 | 0.572 | 1.740 | 0.618 | 1.619 | 0.425 | 2.351 | 0.505 | 1.982 |
| **AST** | 0.344 | 2.906 | 0.565 | 1.771 | 0.565 | 2.161 | 0.151 | 6.631 | 0.633 | 1.581 | 0.442 | 2.261 | 0.522 | 1.917 |
| **Total cholesterol** | 0.807 | 1.239 | 0.820 | 1.220 | 0.820 | 1.216 | 0.827 | 1.209 | 0.832 | 1.202 | 0.826 | 1.210 | 0.827 | 1.210 |
| **FBG** | 0.789 | 1.267 | 0.796 | 1.256 | 0.796 | 1.246 | 0.785 | 1.273 | 0.793 | 1.261 | 0.801 | 1.248 | 0.799 | 1.252 |
| **Platelet count** | 0.482 | 2.076 | 0.576 | 1.735 | 0.576 | 1.791 | 0.394 | 2.538 | 0.428 | 2.334 | 0.810 | 1.235 | 0.563 | 1.776 |
| Superscripts a-g represent multicollinearity diagnostics for different liver fibrosis indices (FIB-4, Modified FIB-4, FIB-5, APRI, Forns, ARR, and AARPRI, respectively) along with relevant covariates to be included in subsequent hemorrhagic transformation analysis. Due to high collinearity between white blood cell count (WBC) and neutrophil count, and considering that WBC comprises both neutrophils and lymphocytes, WBC was excluded while neutrophils and lymphocytes were retained for the multivariable analysis. VIF<10 and Tolerance>0.1 indicate acceptable levels of multicollinearity. | | | | | | | | | | | | | | |
